# Supplementary material for: Impaired Hematologic Status in Relation to Clinical Outcomes among HIV-Infected Adults from Uganda: A Prospective Cohort Study
Source: MDPI journal article supplement (doi:10.3390/nu10040475), 2018-04-12
Supplement: s1 [file s1]

Table S1: Descriptive Statistics for Repeated Bi-annual Assessments of Anemia and Respective Outcomes.

|                                                 | <b>Month 0</b>   | <b>Month 6</b>   | <b>Month 12</b>  | <b>Month 18</b>  |
|-------------------------------------------------|------------------|------------------|------------------|------------------|
|                                                 | <b>Mean (SD)</b> | <b>Mean (SD)</b> | <b>Mean (SD)</b> | <b>Mean (SD)</b> |
| <b>Hemoglobin (mg/dL, mean, SD)</b>             | 12.3 (1.9)       | 12.9 (1.8)       | 13.2 (1.7)       | 13.3 (1.7)       |
| <b>BMI (in kg/m<sup>2</sup>)</b>                | 23.8 (4.4)       | 24.2 (4.3)       | 24.6 (4.2)       | 25.0 (4.4)       |
| <b>QOL Score</b>                                | 91.5 (9.9)       | 97.5 (9.0)       | 98.7 (7.9)       | 98.4 (8.4)       |
| <b>CD4 cell count (Cells/<math>\mu</math>L)</b> | 148.9 (95.9)     | 231.7 (112.4)    | 262.5 (127.8)    | 295.8 (152.1)    |
| <b>Anemia Severity</b>                          | <b>N (%)</b>     | <b>N (%)</b>     | <b>N (%)</b>     | <b>N (%)</b>     |
| <b>No Anemia</b>                                | 206 (51.5)       | 254 (60.8)       | 280 (75.5)       | 284 (77.4)       |
| <b>Mild Anemia</b>                              | 113 (28.3)       | 89 (23.4)        | 64 (17.3)        | 60 (16.4)        |
| <b>Moderate/Severe Anemia</b>                   | 81 (20.3)        | 37 (9.7)         | 27 (7.3)         | 23 (6.3)         |
